# Supplementary material
Source: PubMed Central journal article supplement (PMC8607354)

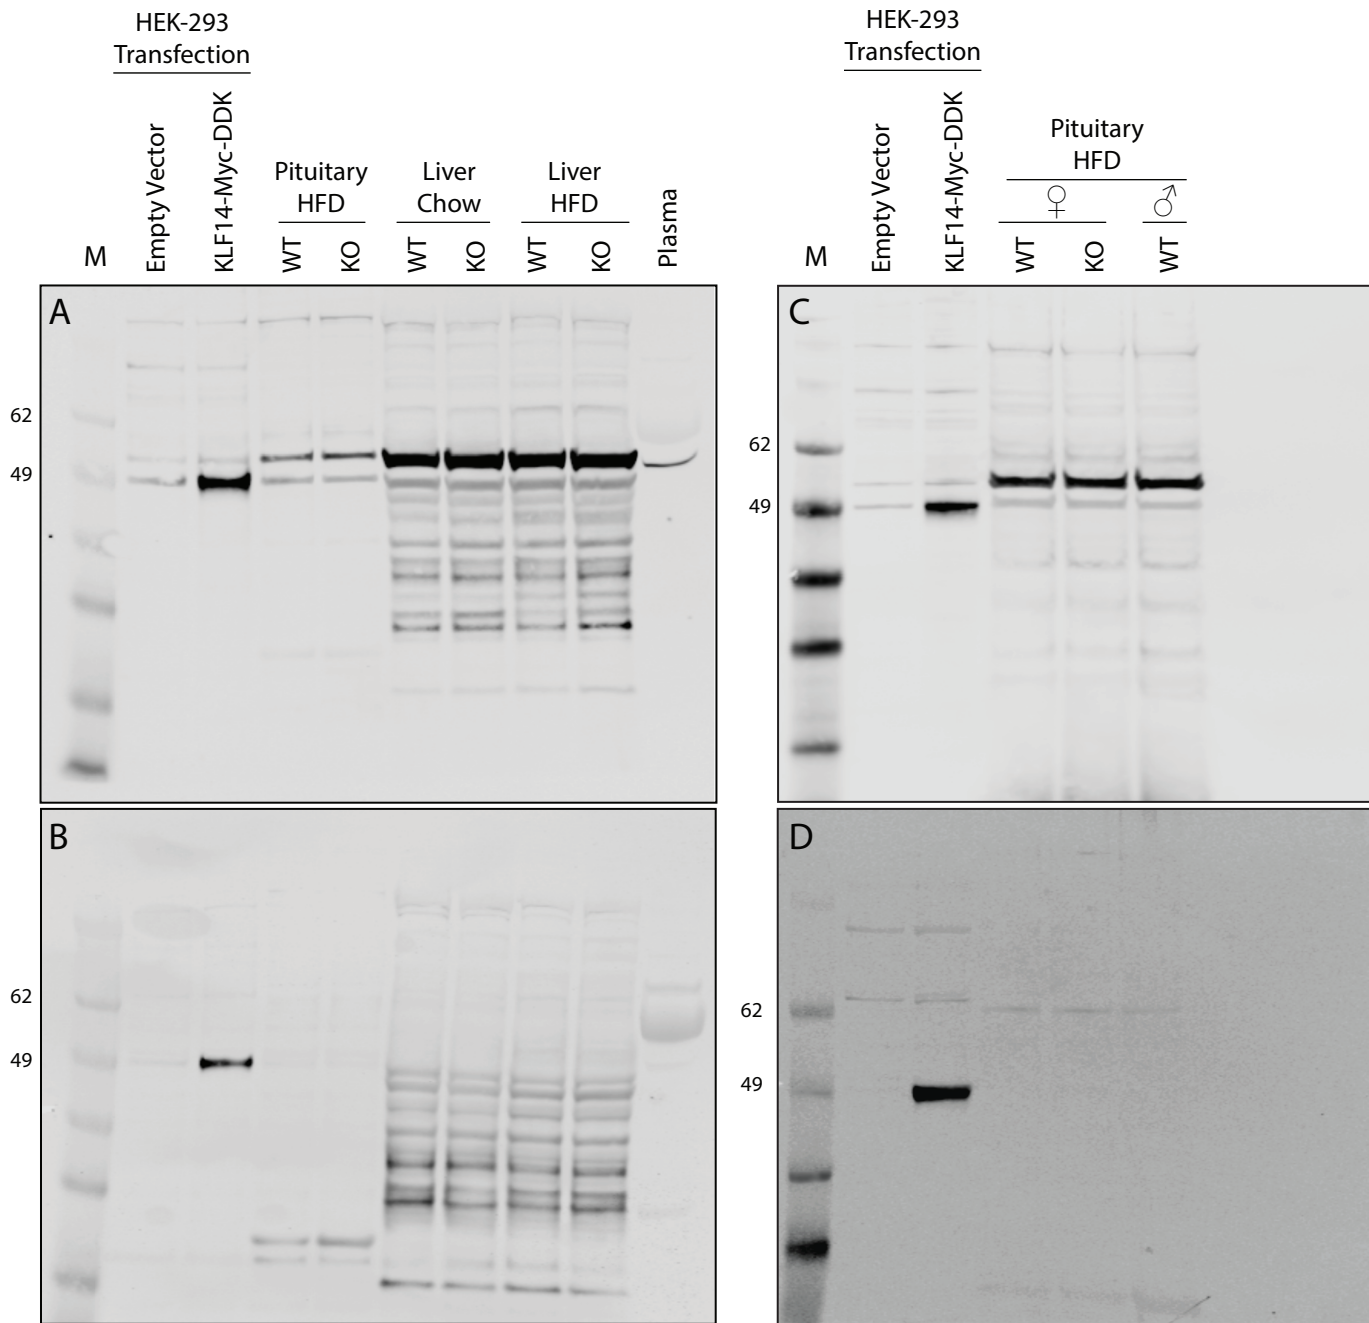

Supplement: NIHMS1754577-supplement-Figure_S1.pdf [file NIHMS1754577-supplement-Figure_S1.pdf]
